# Supplementary material for: Anti-glypican-1 antibody–drug conjugate is a potential therapy against pancreatic cancer
Source: PubMed Central journal article supplement (PMC7189381; doi:10.1038/s41416-020-0781-2), 2020-03-10
Supplement: 41416_2020_781_MOESM1_ESM.pdf [file 41416_2020_781_MOESM1_ESM.pdf]

Supplementary figure 1

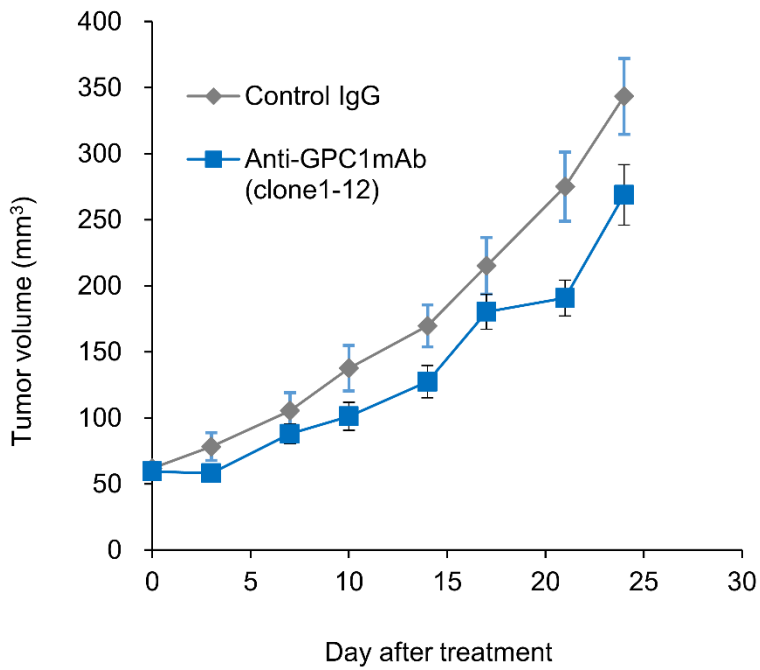

**Supplementary Figure 1. Antitumour activity of anti-GPC1 mAb in BxPC-3 xenograft**

Antitumour efficacy of anti-GPC1 mAb (clone 1-12) in BxPC-3 xenograft models (n = 10). Tumour-bearing mice were administered intraperitoneal control mAb (10 mg kg<sup>-1</sup>) or anti-GPC1 mAb (10 mg kg<sup>-1</sup>) as previously reported.<sup>20</sup> Each point on the graph represents the average tumour volume. Efficacy was not demonstrated

**Supplementary Table 1.****Correlation between GPC1 expression and clinicopathological factors in our patient cohort.**

| Variables             | GPC1 expression |                | <i>p</i> -value |
|-----------------------|-----------------|----------------|-----------------|
|                       | Low<br>(n=42)   | High<br>(n=33) |                 |
| Gender (n)            |                 |                | 0.20            |
| Male                  | 29              | 18             |                 |
| Female                | 13              | 15             |                 |
| Age (yrs.)            |                 |                |                 |
| Median                | 67.2            | 67.1           | 0.12            |
| Diabetes mellitus (n) |                 |                | 0.16            |
| yes                   | 9               | 18             |                 |
| no                    | 24              | 24             |                 |
| Histology type (n)    |                 |                | 0.43            |
| wel/mod               | 39              | 32             |                 |
| por/muc               | 3               | 1              |                 |
| Tumor location (n)    |                 |                | 0.26            |
| Pancreas head         | 24              | 23             |                 |
| Pancreas body or tail | 18              | 10             |                 |
| pT stage (n)          |                 |                | 0.06            |
| T1-2                  | 16              | 6              |                 |
| T3-4                  | 26              | 27             |                 |
| pN stage (n)          |                 |                | 0.048           |
| N0                    | 32              | 18             |                 |
| N1                    | 10              | 15             |                 |

**Supplementary Table 2. IC<sub>50</sub> of MMAF and anti-glypican-1 ADC in BxPC-3 and GPC1 knockdown cell****line**

---

| Cell lines     | Glypican-1 expression<br>(ABC cell <sup>-1</sup> ) | MMAF (nM) | MMAF in anti-glypican-1<br>ADC (nM) |
|----------------|----------------------------------------------------|-----------|-------------------------------------|
| BxPC-3         | 93 290                                             | 31.3      | 0.063                               |
| BxPC-3 NC-11   | 83 880                                             | 26.8      | 0.053                               |
| BxPC-3 KD-2-23 | 18 946                                             | 24.4      | 0.76                                |

---

ABC: antibody binding capacity
